# Supplementary material for: Synthesis, Properties and Aging of ICP-CVD SiCxNy:H Films Formed from Tetramethyldisilazane
Source: MDPI journal article supplement (doi:10.3390/coatings12010080), 2022-01-11
Supplement: s1 [file s1]

# Supplementary Materials: Synthesis, Properties and Aging of ICP-CVD SiC<sub>x</sub>N<sub>y</sub>:H Films Formed from Tetramethyldisilazane

Maksim N. Chagin <sup>1</sup>, Veronica S. Sulyaeva <sup>1</sup>, Vladimir R. Shayapov <sup>1</sup>, Aleksey N. Kolodin <sup>2</sup>,  
Maksim N. Khomyakov <sup>3</sup>, Irina V. Yushina <sup>1</sup> and Marina L. Kosinova <sup>1,\*</sup>

<sup>1</sup> Laboratory of Functional Films and Coatings, Nikolaev Institute of Inorganic Chemistry, SB RAS, 630090 Novosibirsk, Russia; chagin@niic.nsc.ru (M.N.C.); veronica@niic.nsc.ru (V.S.S.); shayapov@niic.nsc.ru (V.R.S.); jush@niic.nsc.ru (I.V.Y.)

<sup>2</sup> Laboratory of Extraction Processes, Nikolaev Institute of Inorganic Chemistry, SB RAS, 630090 Novosibirsk, Russia; kolodin.a.n@mail.ru

<sup>3</sup> Laser Plasma Department, Institute of Laser Physics, SB RAS, 630090 Novosibirsk, Russia; mnkhomy@gmail.com

\* Correspondence: marina@niic.nsc.ru

**Citation:** Chagin, M.N.; Sulyaeva, V.S.; Shayapov, V.R.; Kolodin, A.N.; Khomyakov, M.N.; Yushina, I.V.; Kosinova, M.L. Synthesis, Properties and Aging of ICP-CVD SiC<sub>x</sub>N<sub>y</sub>:H Films Formed from Tetramethyldisilazane. *Coatings* **2022**, *12*, 80. <https://doi.org/10.3390/coatings12010080>

Academic Editor: Alexandru Enesca

Received: 10 December 2021

Accepted: 5 January 2022

Published: 11 January 2022

**Publisher's Note:** MDPI stays neutral with regard to jurisdictional claims in published maps and institutional affiliations.

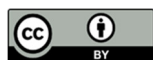

**Copyright:** © 2022 by the authors. Licensee MDPI, Basel, Switzerland. This article is an open access article distributed under the terms and conditions of the Creative Commons Attribution (CC BY) license (<https://creativecommons.org/licenses/by/4.0/>).

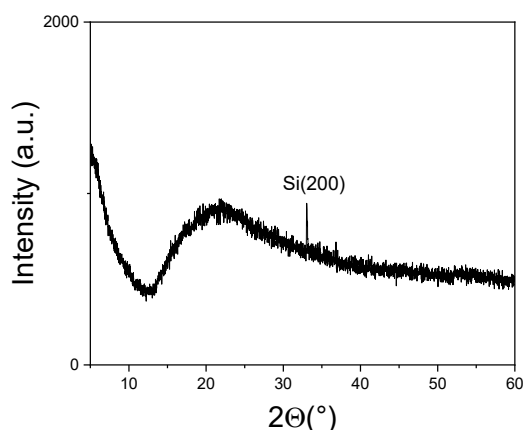

**Figure S1.** XRD pattern of SiC<sub>x</sub>N<sub>y</sub> film. The film deposition conditions: P(TMDSN)=1 × 10<sup>−3</sup> Torr, T<sub>dep</sub>=200 °C, W=200 W, F(Ar) = 30 sccm, F(N<sub>2</sub>) = 0 sccm.

**Table S1.** The surface free energy (surface tension) and its components for test liquids of different polarity (T = 25 ± 2 °C, P = 750 Torr) [1].

| Liquid            | E <sub>t</sub> <sup>d</sup> , mN/m | E <sub>l</sub> <sup>p</sup> , mN/m | E <sub>t</sub> , mN/m |
|-------------------|------------------------------------|------------------------------------|-----------------------|
| Water             | 26.00                              | 46.80                              | 72.80 ± 0.05          |
| Diethylene glycol | 36 ± 2                             | 9 ± 1                              | 45.2 ± 0.4            |

## References

1. Fowkes, F.M. Attractive forces at interfaces. *Ind. Eng. Chem.* **1964**, *56*, 40–52.
